# Supplementary material for: Spectral dependence of photoemission in multiphoton ionization of NO2 by femtosecond pulses in the 375–430 nm range
Source: Royal Society of Chemistry journal article supplement (doi:10.1039/c7cp02057k), 2017-01-01
Supplement: c7cp02057k1.pdf [file c7cp02057k1.pdf]

## Supplementary Material

### EXPERIMENTAL RESULTS

Figure S1 presents a typical time-of-flight spectrum measured at  $\lambda = 400$  nm.

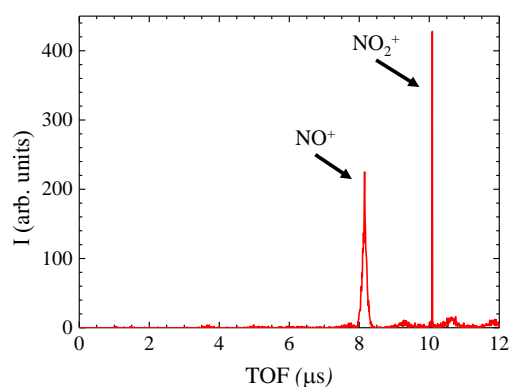

Figure S1: Time-of-flight spectrum for all coincident events (ion, electron) during a measurement at  $\lambda = 400$  nm using a 30 V/cm extraction field.

Figure S2 presents the measured branching ratio for the different main photoionization processes  $\alpha$ , A and D as a function of the excitation wavelength.

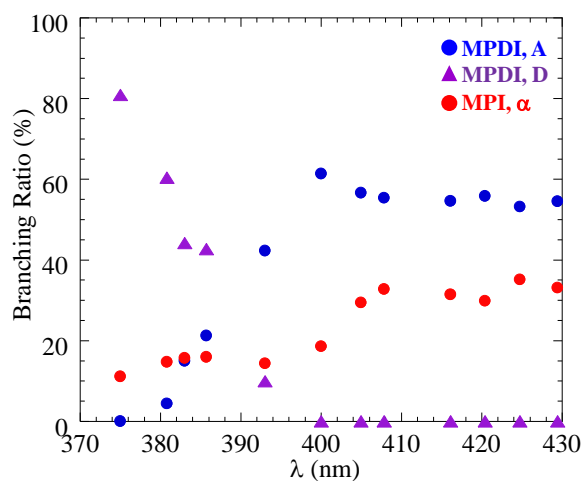

Figure S2: Branching Ratio for the multiphoton ionization process  $\alpha$  and the dissociative ionization processes A and D as a function of the excitation wavelength
